# Supplementary material
Source: PubMed Central journal article supplement (PMC2898479)
Supplement: f-66-00854-sup1.pdf [file f-66-00854-sup1.pdf]

**Supplementary Table 1. Results for cross-rotation and translation searches in molecular replacement.** (The highest peaks in bold prove to be the correct solutions.)

| Model<br>Search                                                                                  | Variable domain (V <sub>H</sub> V <sub>L</sub> ) |                |               |                |               | Constant domain (C <sub>H</sub> C <sub>L</sub> ) |                |               |                |               |
|--------------------------------------------------------------------------------------------------|--------------------------------------------------|----------------|---------------|----------------|---------------|--------------------------------------------------|----------------|---------------|----------------|---------------|
| Top 10<br>cross-<br>rotation<br>search<br>peaks                                                  | peak#                                            | theta1         | theta2        | theta3         | height        | peak#                                            | theta1         | theta2        | theta3         | height        |
|                                                                                                  | <b>1</b>                                         | <b>338.554</b> | <b>61.493</b> | <b>267.078</b> | <b>0.0610</b> | <b>1</b>                                         | <b>325.185</b> | <b>49.005</b> | <b>260.569</b> | <b>0.0721</b> |
|                                                                                                  | 2                                                | 338.189        | 72.743        | 276.187        | 0.0523        | 2                                                | 326.853        | 51.007        | 272.250        | 0.0492        |
|                                                                                                  | 3                                                | 49.838         | 80.752        | 313.773        | 0.0467        | 3                                                | 103.252        | 69.502        | 82.302         | 0.0489        |
|                                                                                                  | 4                                                | 328.677        | 68.738        | 270.680        | 0.0443        | 4                                                | 352.501        | 76.748        | 279.475        | 0.0456        |
|                                                                                                  | 5                                                | 23.311         | 67.500        | 303.208        | 0.0437        | 5                                                | 151.705        | 78.750        | 132.004        | 0.0440        |
|                                                                                                  | 6                                                | 36.271         | 80.752        | 317.790        | 0.0434        | 6                                                | 312.677        | 56.250        | 272.683        | 0.0429        |
|                                                                                                  | 7                                                | 347.180        | 76.748        | 279.608        | 0.0432        | 7                                                | 324.231        | 65.498        | 271.702        | 0.0427        |
|                                                                                                  | 8                                                | 37.225         | 84.757        | 305.394        | 0.0415        | 8                                                | 120.046        | 73.507        | 85.847         | 0.0425        |
|                                                                                                  | 9                                                | 28.171         | 67.500        | 329.326        | 0.0414        | 9                                                | 348.463        | 61.493        | 293.623        | 0.0421        |
|                                                                                                  | 10                                               | 17.172         | 77.512        | 282.795        | 0.0413        | 10                                               | 347.030        | 88.887        | 318.739        | 0.0420        |
|                                                                                                  | mean of cross-rotation function: 0.0307          |                |               |                |               | mean of cross-rotation function: 0.0312          |                |               |                |               |
| Translation<br>search for<br>top 10<br>cross-<br>rotation<br>peaks in<br><i>P3<sub>2</sub>21</i> | peak#                                            | transX         | transY        | transZ         | height        | peak#                                            | transX         | transY        | transZ         | height        |
|                                                                                                  | <b>1</b>                                         | <b>4.62</b>    | <b>53.68</b>  | <b>-69.47</b>  | <b>0.204</b>  | <b>1</b>                                         | <b>-7.91</b>   | <b>66.25</b>  | <b>15.31</b>   | <b>0.263</b>  |
|                                                                                                  | 2                                                | 15.83          | 93.66         | -65.94         | 0.125         | 2                                                | 50.12          | 34.26         | -80.07         | 0.122         |
|                                                                                                  | 3                                                | -1.32          | 54.82         | -69.47         | 0.097         | 3                                                | 33.63          | 35.41         | 8.24           | 0.115         |
|                                                                                                  | 4                                                | 79.13          | 18.27         | 8.24           | 0.092         | 4                                                | 82.43          | 33.12         | 14.13          | 0.156         |
|                                                                                                  | 5                                                | -6.59          | 43.40         | -63.59         | 0.137         | 5                                                | -17.80         | 76.52         | -70.65         | 0.156         |
|                                                                                                  | 6                                                | 78.47          | 35.41         | 11.77          | 0.121         | 6                                                | 61.99          | 50.26         | -61.23         | 0.099         |
|                                                                                                  | 7                                                | 28.36          | 97.08         | 0.00           | 0.109         | 7                                                | 76.49          | 47.97         | 12.95          | 0.122         |
|                                                                                                  | 8                                                | 91.00          | 31.98         | -56.52         | 0.074         | 8                                                | 46.82          | 46.83         | -61.23         | 0.130         |
|                                                                                                  | 9                                                | 67.92          | 33.12         | -61.23         | 0.162         | 9                                                | 89.68          | 4.57          | -69.47         | 0.099         |
|                                                                                                  | 10                                               | 8.57           | 78.81         | -82.43         | 0.104         | 10                                               | 16.49          | 65.10         | 5.89           | 0.118         |
|                                                                                                  | mean of translation function: 0.119              |                |               |                |               | mean of translation function: 0.124              |                |               |                |               |
